# Supplementary material for: Understanding Customer Retrials in Call Centers: Preferences for Service Quality and Service Speed
Source: Atypon-hosted journal article supplement (doi:10.1287/msom.2021.0976), 2021-07-09
Supplement: msom.2021.0976.sm1.pdf [file msom.2021.0976.sm1.pdf]

1 Understanding Customer Retrials in Call Centers:  
2 Preferences for Service Quality and Service Speed

3 Kejia Hu

4 Operations Management and Quantitative Methods, Owen School of Management, Vanderbilt University, Nashville, TN  
5 37215, kejia.hu@owen.vanderbilt.edu,

6 Gad Allon

7 Operations, Information and Decisions Department, The Wharton School, University of Pennsylvania, Philadelphia,  
8 Pennsylvania 19104, g-allon@kellogg.northwestern.edu,

9 Achal Bassamboo

10 Department of Managerial Economics and Decision Sciences, Kellogg School of Management, Northwestern University,  
11 Evanston, IL 60208, a-bassamboo@kellogg.northwestern.edu

12

13

---

14

## 15 A. Illustration of Retrial Identification with Three Examples

16 Now we illustrate our retrial identification procedure with three examples. The first example shows  
17 that our method performs well on frequent callers. The second and third examples demonstrate  
18 that our approach also correctly distinguishes retrial calls from regular callbacks for customers  
19 making limited calls.

20 We begin with the first example illustrated in Figure 1. In the graph, we plot a customer's calling  
21 activity over time. Each point indicates a customer calling (y-value at 1) or not calling (y-value at  
22 0) in each hour. The number in between indicates the gap (in days) between two consecutive calls.  
23 For example, 18 days are between the first and second calls, and 3.2 days between the second and  
24 third calls. Retrial calls are highlighted with dashed lines. We can see our change point detection  
25 identifying the first retrial as a call coming 0.2 days after the previous call. This is indeed a change  
26 in the calling frequency since all the previous gaps are several days long. The second, third, and  
27 fourth retrial calls are similar, coming in 0.1 days,  $<0.05$  days, and 0.1 days after the previous  
28 call. Then we have three consecutive calls, with the initial two showing calling gaps of  $<0.05$  days,  
29 while the third has 0.2 days. In this case, we see that our change point detection method only  
30 identifies the first call among the three consecutive calls as a retrial but not the later ones. This  
31 is because the calling frequency is already in the high-frequency zone, and no change point is  
32 detected. Hence we need the second statistical test to pin down a retrial window, which is the  
33 length of the high-frequency zone.

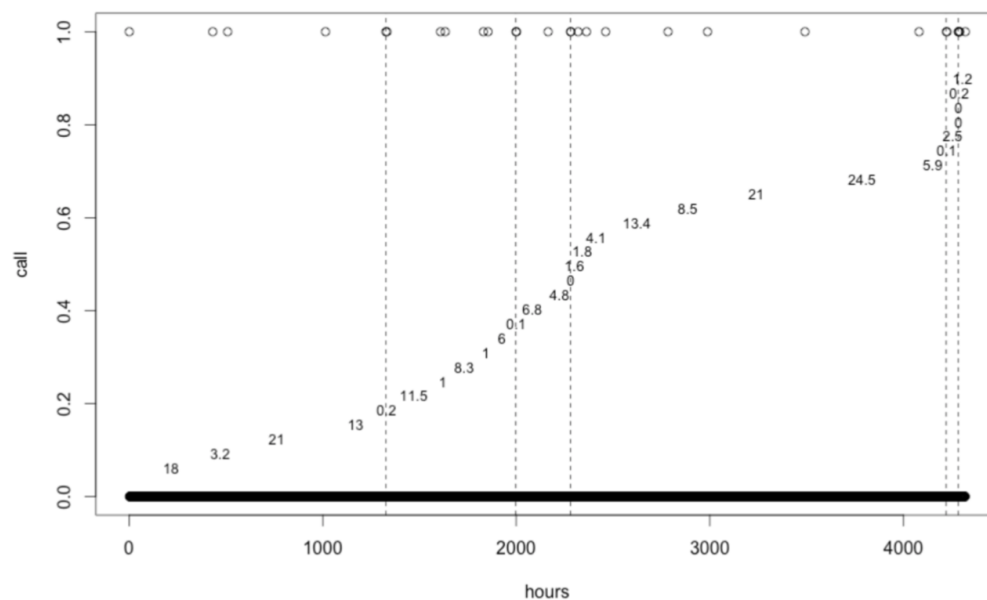

Figure 1 Example 1 for Retrial Identification



44 Example 2 illustrated in Figure 3 is another case where calls are evenly spread out. We don't  
 45 identify retrials with our algorithm. Hence we do not need a retrial window for this customer.

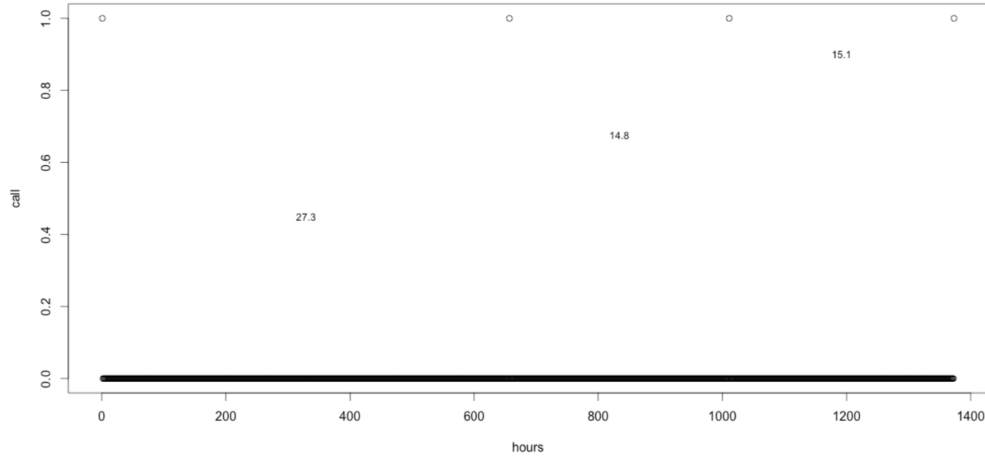

Figure 3 Example 2 for Retrial Identification — No retrial is identified

46 Example 3 in Figure 4 illustrates another case where the number of calls is not frequent, but we  
 47 can still identify retrials. We proceed with the Kolmogorov-Smirnov test to pin down the length  
 48 of the retrial window. In this example, the retrial window is 1 day.

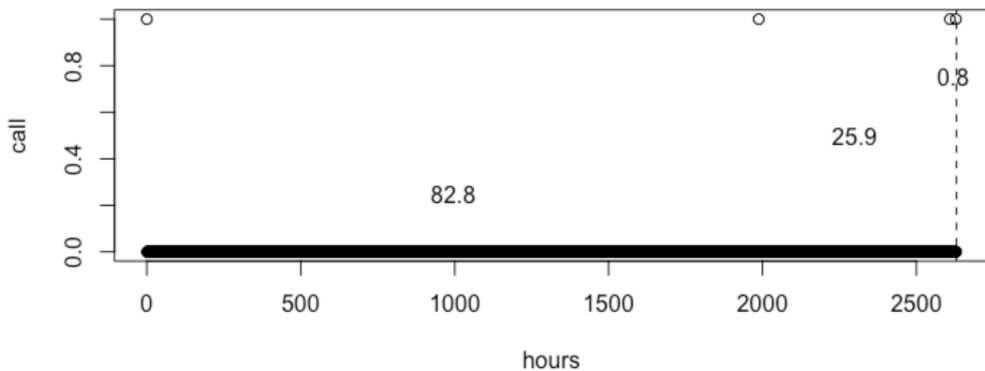

Figure 4 Example 3 for Retrial Identification — Calls are not frequent but a retrial is identified

49 Using these three examples, we want to achieve two purposes: illustrating our retrial identification  
 50 approach and demonstrating its feasibility to identify retrials for both frequent and infrequent  
 51 callers. In the next section, we further validate our retrial identification approach by using a sub-  
 52 sample of calls with known retrial conditions.

## B. Validation of Retrial Identification with Known-Request Calls

In this section, we validate our retrial identification’s performance using a sub-sample of calls with known retrial conditions.

We observe customers’ requests in some recorded calls. If a customer’s two consecutive calls make the same request, the second call is noted as a retrial. Alternatively, if the second call is for a different request, the second call is not a retrial. The service requests in Table 2 reflect customers’ actual service needs and will trigger retrials if not served appropriately. Service requests that are too ambiguous or not likely to trigger retrials, such as “general information,” “current account,” and “login with the initial password,” are not on the list.

---

|                                                     |                                                  |
|-----------------------------------------------------|--------------------------------------------------|
| - Emergent mortgage                                 | - Investment - foreign securities                |
| - Foreign currency exchange rate, quote and deposit | - Investment - mortgages                         |
| - International Banking                             | - Investment - private banking                   |
| - Insurance - change policy                         | - Investment - provident fund                    |
| - Insurance - demands                               | - Investment - recruiting                        |
| - Insurance - dues inquiries                        | - Investment - trading room                      |
| - Insurance - endorsement                           | - Investment - value of the securities portfolio |
| - Insurance - new sales                             | - Loans                                          |
| - Insurance - stance                                | - Password blocked/forgotten, release password   |
| - Pensionary                                        | - Postdated checks                               |
| - Securities portfolio                              | - Short-term deposit                             |

---

**Table 2** Meaningful Service Requests

### B.1. Validating the accuracy of retrial identification

After identifying retrials qualitatively, we compare the classification with quantitatively classified retrials using our algorithm.

Qualitatively, there are 511,744 calls identified as retrials. Our algorithm identified 463,049 of those calls as retrials, an accuracy rate of 90.5%.

Qualitatively, there are 956,064 calls identified as retrials. Our algorithm identified 736,169 of those calls as retrials, an accuracy rate of 77.4%.

The overall accuracy rate of our identification approach is 82% ( $= (463,049 + 736,169)/(511,744 + 956,064)$ ).

### B.2. Validating the quantification of the retrial window

We also use calls with identifiable requests to examine the performance of our retrial window detection. In this section, we describe our validation procedure step-by-step and also show the examination results. Overall, we conclude that the retrial windows identified with our algorithm are statistically indifferent to the actual retrial window in the identified calls.

To begin with the validation, we first locate customers whose calls are recorded as meaningful service requests, as shown in Table 2. Altogether, there are 13,646 customers who have two consecutive calls that both are recorded with meaningful service requests. Among them, 52% are business customers and 48% are private customers.

Second, for each located customer, we measure his/her actual time gaps for retrials. If two consecutive calls are identified with the same meaningful service requests, we consider the second call as a retrial. By measuring the time gap between the first and second calls, we can obtain a data point for the actual retrial gap. Each customer can have several retrial gap measurements if they have multiple retrials.

In the third step, we compare customers' actual retrial gaps with our identified retrial window and summarize the results in Table 3. We first examine whether the identified retrial windows are too narrow. For each customer, we calculate the fraction of his actual retrial gaps that are less than our defined retrial window. We summarize the fraction from every customer located in the first step. The first row of Table 3 summarizes, across customers, the defined retrial windows cover the actual retrial gaps well. For more than 75% of the customers, the retrial window covers 95% of the actual retrial gaps, and for more than 50% of the customers, the retrial window's coverage is 100%. Secondly, to ease the concern that our identified retrial window is too loose, we perform another examination to check the difference between our defined retrial window and the largest actual retrial gap within the retrial window. The results are summarized in the second row of Table 3. Across all customers, the maximum time difference is 0.29 days. Since the unit of our retrial window is a day, these time differences indicate that the defined retrial windows are not loose. To summarize, when validating the defined retrial windows with the actual retrial gaps, we find that they are neither too narrow (confirmed by the first row of Table 3) nor too loose (confirmed by the second row of Table 3).

|                                  | <i>Min</i> | <i>Q1</i> | <i>Median</i> | <i>Mean</i> | <i>Q3</i> | <i>Max</i> |
|----------------------------------|------------|-----------|---------------|-------------|-----------|------------|
| $Prob(l_i^R < T_i)$              | 57%        | 95%       | 100%          | 95%         | 100%      | 100%       |
| $T_i - Max(l_i^R   l_i^R < T_i)$ | 0.02d      | 0.05d     | 0.07d         | 0.12d       | 0.14d     | 0.29d      |

**Table 3 Validation of the Identified Retrial Window**

Note:  $l_i^R$  is a random retrial gap of customer  $i$  and  $T_i$  is his retrial window.

### 100 C. Validating the Assumption of a Constant Local Arrival Rate

101 In this section, we strengthen our retrial identification approach by validating its core assumption:  
102 that a customer has a local constant arrival rate when retrials are absent.

103 To examine the stable calling frequency prior to a retrial call, we perform a rolling-based com-  
104 parison to investigate whether a customer's calling frequencies during Period  $t$  and Period  $t - 1$  are

105 similar. Each period is measured as a day, i.e., the same unit used when quantifying customers’  
 106 retrieval windows. For each customer, we empirically obtain two time series, the calling frequency and  
 107 the 1-period lagged series of it. We then perform a paired Wilcoxon test, a non-parametric test, to  
 108 examine whether the difference between the two paired series is significantly different from 0. If the  
 109 testing shows a small p-value, it would indicate that the calling frequencies of Period  $t$  and Period  
 110  $t - 1$  for this customer are significantly different. Otherwise, we would conclude that the calling  
 111 frequencies during the period prior to a retrieval call are stable. We summarize the testing result for  
 112 each customer in Table 4. The p-values from all customers suggest that the calling frequency of  
 113 Period  $t$  is statistically similar to the calling frequency of Period  $t - 1$  when retrials are absent.

| <i>Min</i> | <i>Q1</i> | <i>Median</i> | <i>Mean</i> | <i>Q3</i> | <i>Max</i> |
|------------|-----------|---------------|-------------|-----------|------------|
| 0.432      | 0.723     | 0.830         | 0.814       | 0.941     | 1.000      |

**Table 4 Summary Statistics of P-values for All Customers**

Null Hypo: A customer’s calling frequency prior to a retrieval call is stable. Reject the null if P-val  
 is small.

114 We also confirm there are no changes from the external environment that may distort our change  
 115 point detection method. Change point detection is used to detect an anomaly in an individual’s  
 116 calling frequency. If the system also simultaneously displays an anomaly in calling frequency, our  
 117 detection of retrials may be biased, for example, mistaking a seasonality spike as an individual  
 118 spike in his calling frequency. Through various statistical tests and visual checks, we confirm that  
 119 there is no systematic change, such as seasonality, day of the week effect, or market events, that  
 120 may distort our identification.

## 121 **D. Robustness Checks**

122 To check the robustness of our results, we validate our findings from three perspectives.

### 123 **D.1. Distinct Preferences**

124 First, we validate the distinct preferences between customer segments and across agent groups  
 125 by demonstrating that the general model shown in our main paper fits the observations better  
 126 compared to nested models where we restrict the difference in parameters across agent groups or  
 127 customer segments.

128 The four model variations we examine are:

- 129 • Model – Different Agent Different Customer (our original model) where we consider the param-  
 130 eters to be different for each customer segment and agent group.
- 131 • Model – Same Agent Different Customer where we consider the parameters to be the same  
 132 across agent groups but distinct between customer segments.

133 • Model – Different Agent Same Customer where we consider the parameters to be different  
134 across agent groups but no distinction between customer segments.

135 • Model – Same Agent Same Customer where we consider the parameters to be the same across  
136 agent groups and no distinction between customer segments.

137 The nested models' estimation results show findings consistent with our main model's regarding  
138 the distinction each can characterize between customer segments or across agent groups.

139 We compare the four models in Table 5 to investigate which better fits our data (using log-  
140 likelihood) and which best balances between data fit and model complexity (using AIC, the Akaike  
141 information criterion). The log-likelihood is a direct output from the estimation. AIC is computed as  
142  $2k - 2\loglikelihood$ , where  $k$  is the number of parameters. The best model is the one corresponding  
143 to the smallest AIC. From the calculation formula for AIC, we see that AIC rewards goodness of  
144 fit (assessed by the log-likelihood) but also penalizes models with too many parameters (such as  
145 our complex main model). In this way, AIC discourages overfitting. From Table 5, we find that  
146 the best model (based on the largest log-likelihood and smallest AIC) is our original model which  
147 distinguishes across agents and between customer segments.

| Model                | Diff Agent<br>Diff Customer | Same Agent<br>Diff Customer | Diff Agent<br>Same Customer | Same Agent<br>Same Customer |
|----------------------|-----------------------------|-----------------------------|-----------------------------|-----------------------------|
| Log-likelihood       | <b>-3652121</b>             | -4645198                    | -7020930                    | -7148419                    |
| Number of Parameters | 26                          | 14                          | 13                          | 7                           |
| AIC                  | <b>7304295</b>              | 9290424                     | 14041886                    | 14296852                    |

**Table 5 Comparison across Four Candidate Models. The first column shows the main model in the paper. The following three columns show three nested models.**

## 148 D.2. Frequent Callers

149 In this subsection, we examine whether our findings are sensitive to customers' knowledge of the  
150 call center's service design by using sub-samples of calls from frequent callers.

151 First, we sort customers based on their calling frequency in our observation period, then construct  
152 the following sub-samples:

153 • Top 1%: this sample is composed of calls from customers whose calling frequency is ranked as  
154 the top 1% in the corresponding segment. The sample size is 244,079 calls for the private segment  
155 and 12,920 calls for the business segment.

156 • Top 5%: this sample is composed of calls from customers whose calling frequency is ranked as  
157 the top 5% in the corresponding segment. The sample size is 600,912 calls for the private segment  
158 and 25,593 calls for the business segment.

159 • Top 10%: this sample is composed of calls from customers whose calling frequency is ranked as  
160 the top 10% in the corresponding segment. The sample size is 830,653 calls for the private segment  
161 and 32,002 calls for the business segment.

162 • Top 25%: this sample is composed of calls from customers whose calling frequency is ranked  
163 as the top 25% in the corresponding segment. The sample size is 1,263,334 calls for the private  
164 segment and 45,376 calls for the business segment.

165 Second, we estimate our structural model using the four sub-samples and compare their results  
166 with our main model's. All key findings we highlight in Section 6 remain the same.

### 167 **D.3. Known Retrials and Non-Retrials**

168 Third, we examine our findings by using sub-samples of calls with qualitatively defined retrials and  
169 non-retrials.

170 First, we extract sub-samples from the dataset. The unit of analysis of our structural model  
171 is one call episode. To construct a sub-sample covering only correctly identified retrials, we pick  
172 episodes where 1) all the retrials and non-retrials are labeled based on service requests; 2) our  
173 algorithm correctly labels all retrials and non-retrials. To construct a sub-sample with wrongly  
174 identified retrials, we pick episodes where 1) all the retrials and non-retrials are labeled based on  
175 service requests, and 2) our algorithm incorrectly labels at least one non-retrial as a retrial or one  
176 retrial as a non-retrial. For the correctly identified sub-sample, we have 43,986 private customer  
177 episodes and 6,416 business customer episodes. For the wrongly identified sub-sample, we have  
178 30,916 private customer episodes and 1,589 business customer episodes.

179 Second, we estimate our structural model using the two sub-samples of correctly and incorrectly  
180 identified calls and compare the results with our main model's. We find that the key findings we  
181 highlight in the paper remain the same.
